# Supplementary material for: Non-Genetic Factors and Risk of Cervical Cancer: An Umbrella Review of Systematic Reviews and Meta-Analyses of Observational Studies
Source: PubMed Central journal article supplement (PMC10103589; doi:10.3389/ijph.2023.1605198), 2023-03-31
Supplement: Table1.pdf [file Table1.pdf]

**International Journal of Public Health**

**Review**

**Supplementary materials**

**Table S1. Search strategy used in the umbrella review (Liaoning, China. 2020)**

|                                                                                                                                                                                                                                                                                                             |
|-------------------------------------------------------------------------------------------------------------------------------------------------------------------------------------------------------------------------------------------------------------------------------------------------------------|
| Literature search strategy in PubMed                                                                                                                                                                                                                                                                        |
| ((cervical [title/abstract]) OR (uterine cervical [title/abstract])) AND ((cancer [title/abstract]) OR (tumor [title/abstract]) or (tumour [title/abstract]) or (neoplasm [title/abstract]) or (carcinoma [title/abstract])) and ((systematic review [title/abstract]) or (meta-analysis [title/abstract])) |
| Literature search strategy in Web of Science                                                                                                                                                                                                                                                                |
| 1: Search TS = (cervical OR uterine cervical)                                                                                                                                                                                                                                                               |
| 2: Search TS = (cancer OR tumor OR tumour OR neoplasm OR carcinoma)                                                                                                                                                                                                                                         |
| 3: Search TS = (systematic review OR meta-analysis)                                                                                                                                                                                                                                                         |
| 4: #3 AND #2 AND #1                                                                                                                                                                                                                                                                                         |
| Literature search strategy in EMBASE                                                                                                                                                                                                                                                                        |
| 1: cervical:ab,ti                                                                                                                                                                                                                                                                                           |
| 2: “uterine cervical”:ab,ti                                                                                                                                                                                                                                                                                 |
| 3: #1 OR #2                                                                                                                                                                                                                                                                                                 |

|                               |
|-------------------------------|
| 4: cancer:ab,ti               |
| 5: tumor:ab,ti                |
| 6: tumour:ab,ti               |
| 7: neoplasm:ab,ti             |
| 8: carcinoma:ab,ti            |
| 9: #4 OR #5 OR #6 OR #7 OR #8 |
| 10: "systematic review":ab,ti |
| 11: "meta analysis":ab,ti     |
| 12: #10 OR #11                |
| 13: #3 AND #9 AND #12         |

**Table S2. Detailed evaluation of the methodological quality with AMSTAR (Liaoning, China. 2021)**

| Author                            | AMSTAR |        |        |        |        |        |        |        |        |         |         | total | Quality          |
|-----------------------------------|--------|--------|--------|--------|--------|--------|--------|--------|--------|---------|---------|-------|------------------|
|                                   | 1-item | 2-item | 3-item | 4-item | 5-item | 6-item | 7-item | 8-item | 9-item | 10-item | 11-item |       |                  |
| Asthana et al (10)                | Yes    | CA     | Yes    | No     | No     | Yes    | Yes    | Yes    | Yes    | Yes     | Yes     | 8     | high quality     |
| Berrington de González et al (33) | CA     | CA     | No     | CA     | No     | Yes    | No     | Yes    | Yes    | No      | No      | 3     | low quality      |
| Cao et al (38)                    | CA     | CA     | Yes    | CA     | No     | Yes    | No     | Yes    | Yes    | Yes     | Yes     | 6     | moderate quality |
| Cortessis et al (44)              | No     | CA     | Yes    | No     | Yes    | Yes    | No     | Yes    | Yes    | Yes     | Yes     | 7     | moderate quality |
| De Lima et al (41)                | CA     | CA     | No     | No     | No     | Yes    | No     | No     | Yes    | No      | No      | 2     | low quality      |
| Hang et al (39)                   | CA     | CA     | No     | No     | No     | Yes    | No     | No     | Yes    | Yes     | Yes     | 4     | moderate quality |
| He et al (48)                     | CA     | Yes    | Yes    | CA     | No     | Yes    | Yes    | Yes    | Yes    | Yes     | Yes     | 8     | high quality     |
| Hu et al (49)                     | Yes    | Yes    | Yes    | No     | No     | Yes    | Yes    | Yes    | Yes    | Yes     | Yes     | 9     | high quality     |
| Lehtinen et al (37)               | CA     | CA     | No     | CA     | No     | Yes    | No     | No     | Yes    | No      | No      | 2     | low quality      |
| Li et al (45)                     | CA     | CA     | CA     | CA     | No     | Yes    | Yes    | Yes    | Yes    | Yes     | Yes     | 6     | moderate quality |
| Li et al (43)                     | CA     | Yes    | Yes    | CA     | No     | Yes    | Yes    | Yes    | Yes    | Yes     | Yes     | 8     | high quality     |
| Poorolajal et al (35)             | CA     | Yes    | Yes    | CA     | No     | Yes    | Yes    | Yes    | Yes    | Yes     | Yes     | 8     | high quality     |
| Appleby et al (34)                | CA     | CA     | CA     | CA     | No     | Yes    | No     | No     | Yes    | No      | Yes     | 3     | low quality      |
| Sugawara et al (36)               | CA     | CA     | Yes    | No     | No     | Yes    | No     | Yes    | Yes    | Yes     | Yes     | 6     | moderate quality |
| Wang et al (42)                   | Yes    | Yes    | Yes    | No     | No     | Yes    | Yes    | Yes    | Yes    | Yes     | Yes     | 9     | high quality     |
| Wang et al (46)                   | CA     | Yes    | Yes    | CA     | No     | Yes    | Yes    | Yes    | Yes    | Yes     | Yes     | 8     | high quality     |
| Zhang et al (47)                  | CA     | CA     | Yes    | No     | No     | Yes    | Yes    | Yes    | Yes    | Yes     | Yes     | 7     | moderate quality |
| Zhu et al (40)                    | Yes    | CA     | Yes    | No     | No     | Yes    | Yes    | Yes    | Yes    | Yes     | Yes     | 8     | high quality     |

**Table S3. The criteria for classification of the credibility of the evidence (Liaoning, China. 2022)**

| Evidence                     | Criteria                                                   |
|------------------------------|------------------------------------------------------------|
| Strong                       | Summary random effect p value < $10^{-6}$                  |
|                              | Cases > 1000 or participants > 20000                       |
|                              | The largest study reported a significant effect (p < 0.05) |
|                              | 95% prediction interval excludes null value                |
|                              | $I^2 < 50\%$                                               |
|                              | No evidence of small-study effects (p > 0.1)               |
|                              | No evidence of excess of significance (p > 0.1)            |
| Highly-suggestive evidence   | Summary random effect p value < $10^{-6}$                  |
|                              | Cases > 1000 or participants > 20000                       |
|                              | The largest study reported a significant effect (p < 0.05) |
| Suggestive evidence          | Summary random effect p value < $10^{-3}$                  |
|                              | Cases > 1000 or participants > 20000                       |
| Weak evidence                | Summary random effect p value < 0.05                       |
| Non-significant associations | Summary random effect p value > 0.05                       |
